# Supplementary material for: Cleavage of the Jaw1 C-terminal region enhances its augmentative effect on the Ca2+ release via IP3 receptors
Source: Oxford University Press journal article supplement (doi:10.1242/jcs.260439), 2023-02-15
Supplement: jcs260439supp.pdf [file jcs260439supp.pdf]

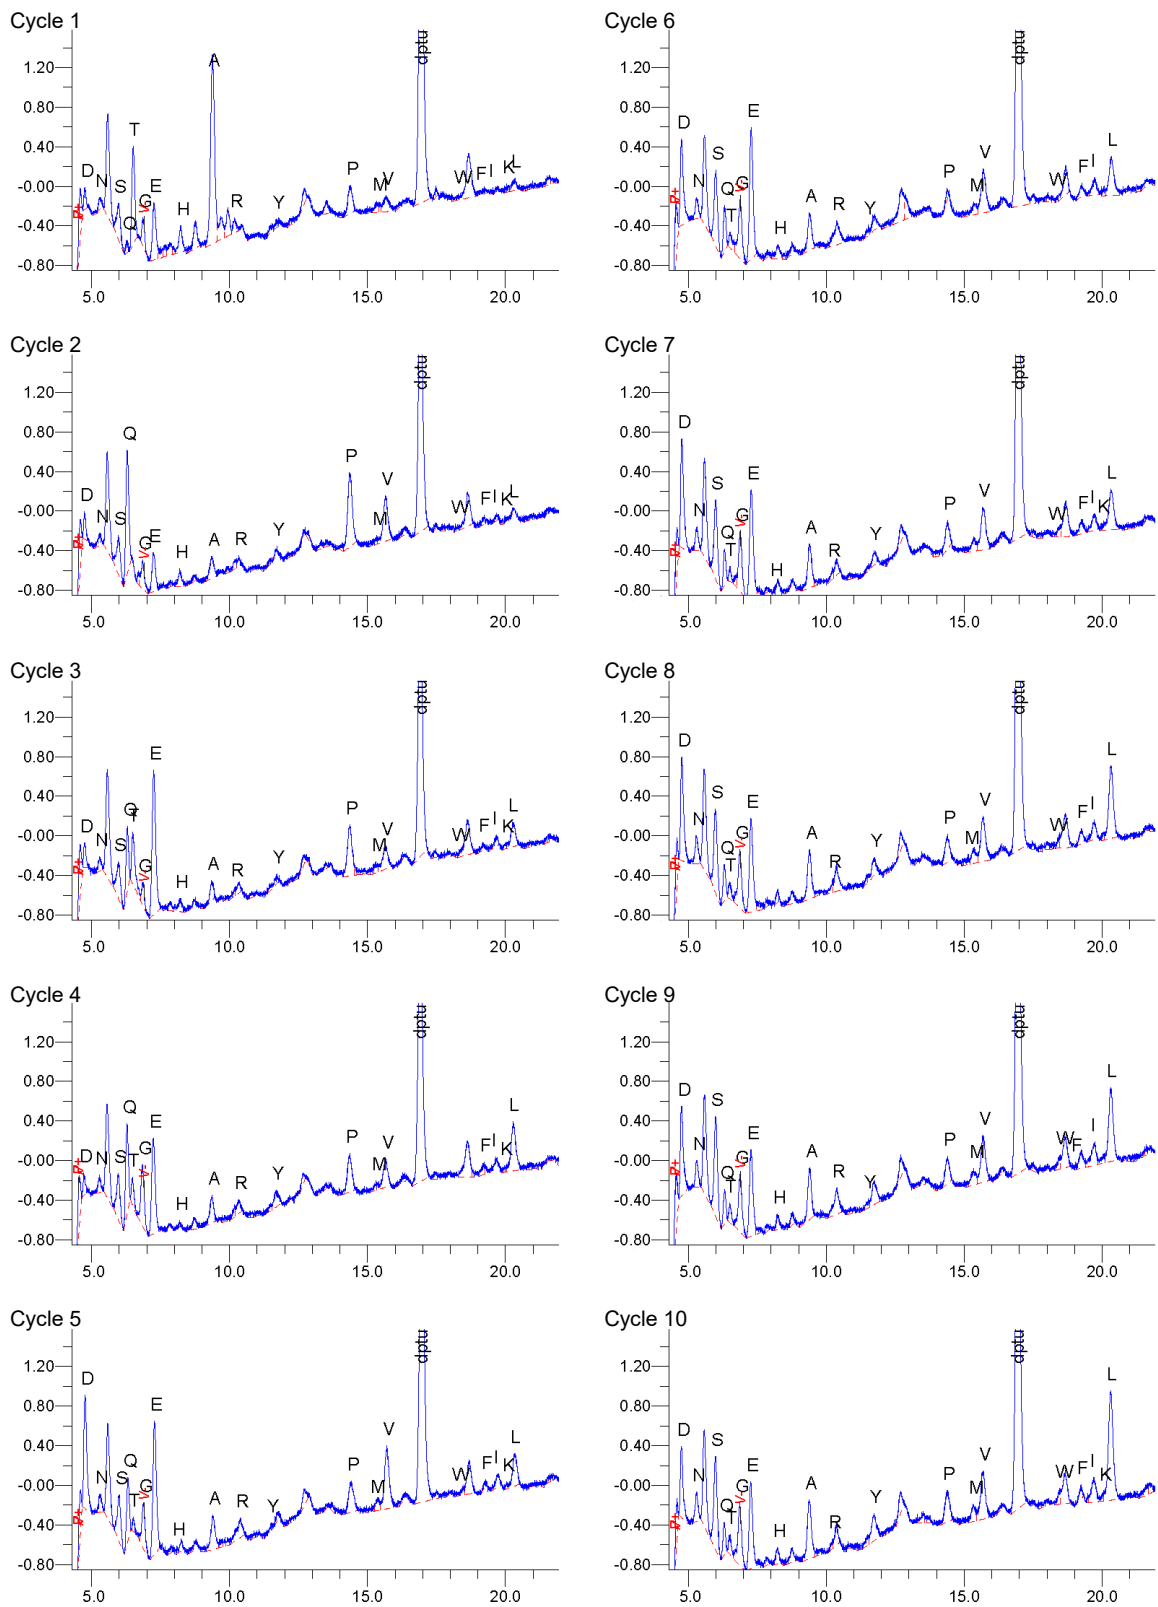

**Fig. S1. N-terminal sequence analysis of Fragment 2.** Ms Jaw1 NIDR PA (Fig. 3F) was expressed in HEK293 cells and immunoprecipitated with an anti-PA antibody. After SDS-PAGE and electrotransfer to a PVDF membrane, the protein band corresponding to Fragment 2 (Fig. 3H) was applied on a protein sequencer, on which Edman microsequencing was performed for 10 cycles. Resultant phenylthiohydantoin-amino acids (PTH-AA) were separated automatically on a C18 HPLC column.

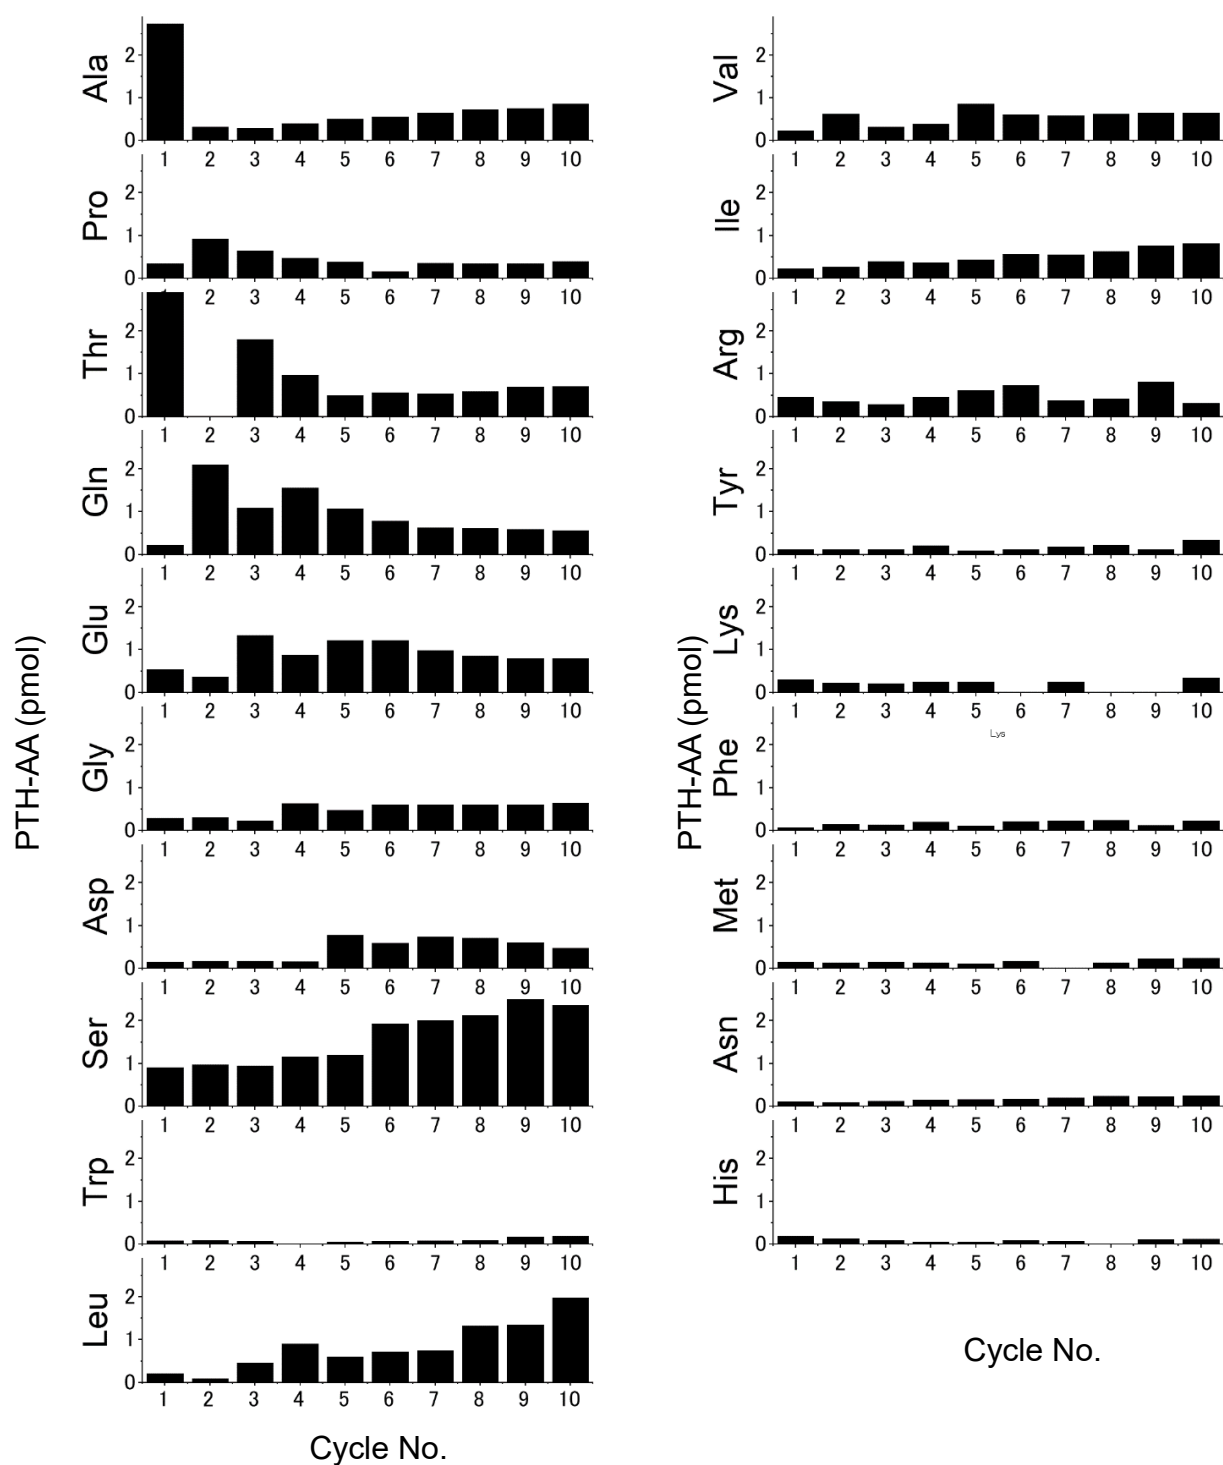

**Fig. S2. Yields of PTH-AAs in Edman microsequencing cycles.** Each chromatogram from protein sequencing (Fig. S1) was analyzed in SequencePro software (Applied Biosystems) to determine the yields of each PTH-AA. Yields of each PTH-AA over 10 cycles were depicted as bar graphs using OriginPro 2019 software (OriginLab Corporation). Possible protein sequences were determined by visual comparison between chromatograms of neighboring cycles overlaid on SequencePro as well as inspecting the changes in yields of each PTH-AA throughout the cycles, with background peaks and carry-over taken into account. As a result, one or more PTH-AAs were identified in each cycle: Residue 1: A and T, Residue 2: P and Q, Residue 3: T and E, Residue 4: Q and G and Residue 5: E and D, Residue 6: G and S, Residue 7: D, Residue 8: L, Residue 9: S, Residue 10: L. Cysteine was undetectable in this experiment because the sample was not treated with an alkylating reagent, and so was not shown in this figure.

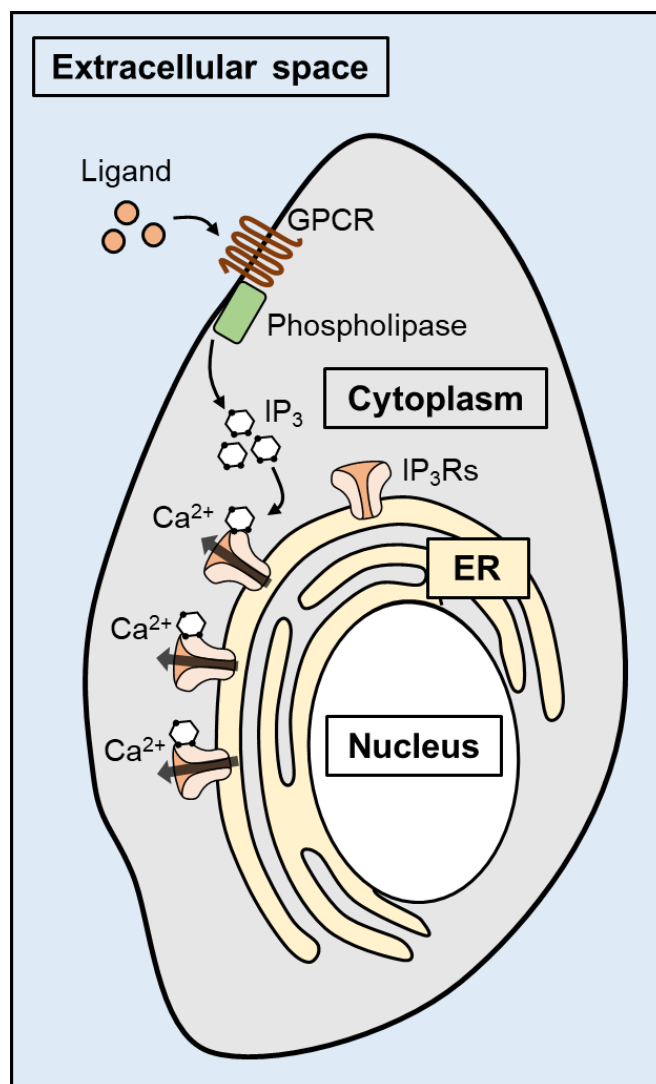

**Fig. S3. Schematic diagram showing the Ca<sup>2+</sup> signaling pathway upon GPCR stimulation.** Once the ligands stimulate the GPCR, the IP<sub>3</sub> is produced by phospholipase. Subsequently, the IP<sub>3</sub> is bound with IP<sub>3</sub>Rs, resulting in the Ca<sup>2+</sup> release from the ER into the cytoplasm.

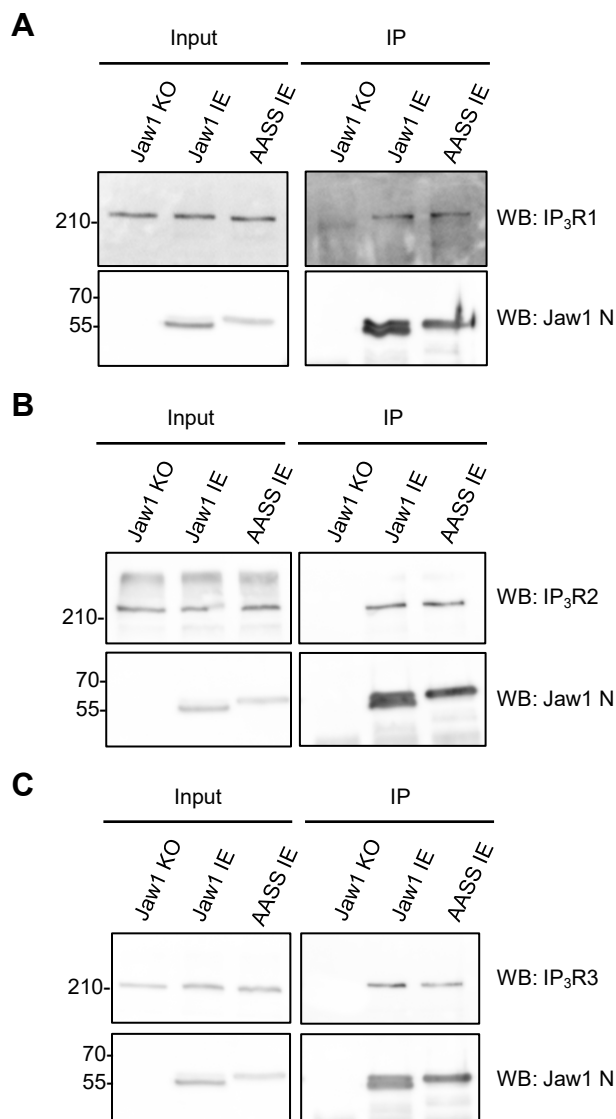

**Fig. S4. Investigation into the relevance of the Jaw1 C-terminal cleavage event to its interaction with IP<sub>3</sub>Rs.** Jaw1 KO, Jaw1 IE, and AASS IE cells were treated with Dox for 24 h. The lysates were subjected to co-immunoprecipitation assay using an anti-Jaw1 N antibody followed by western blotting using an anti-IP<sub>3</sub>R1 antibody (A), an anti-IP<sub>3</sub>R2 antibody (B), and an anti-IP<sub>3</sub>R3 antibody (C) with an anti-Jaw1 N antibody. The representative blot images from two independent experiments with similar results are shown.

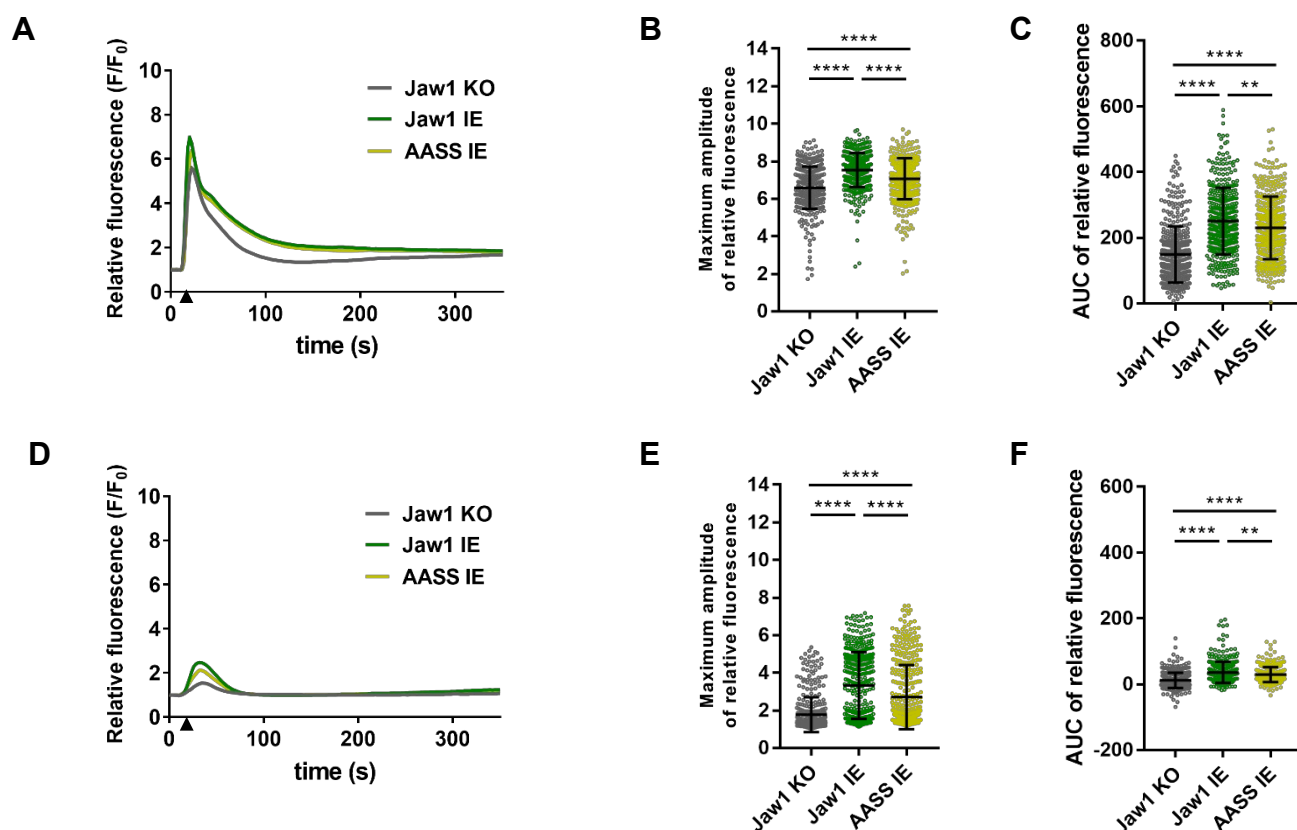

**Fig. S5. Investigation into the relevance of the Jaw1 C-terminal cleavage event to the regulation of  $Ca^{2+}$  release via  $IP_3$ Rs.** Jaw1 KO, Jaw1 IE, and AASS IE cells were treated with Dox for 24 h followed by  $Ca^{2+}$  imaging. The cells were stimulated with 5  $\mu$ M (A–C) and 0.5  $\mu$ M (D–F) ATP solution. A, D) Mean curves of relative Fluo-4 intensity. Closed triangles represent the time points that ATP solution was added. B, C, E, F) The maximum amplitude (B, E) and AUC (C, F) of relative Fluo-4 intensity ( $n = 400$ ). B, C, E, F). Error bar shows  $\pm$  SD, \*\* $P < 0.01$ ; \*\*\*\* $P < 0.0001$ . Statistics: one-way ANOVA followed by Tukey’s multiple comparison test.

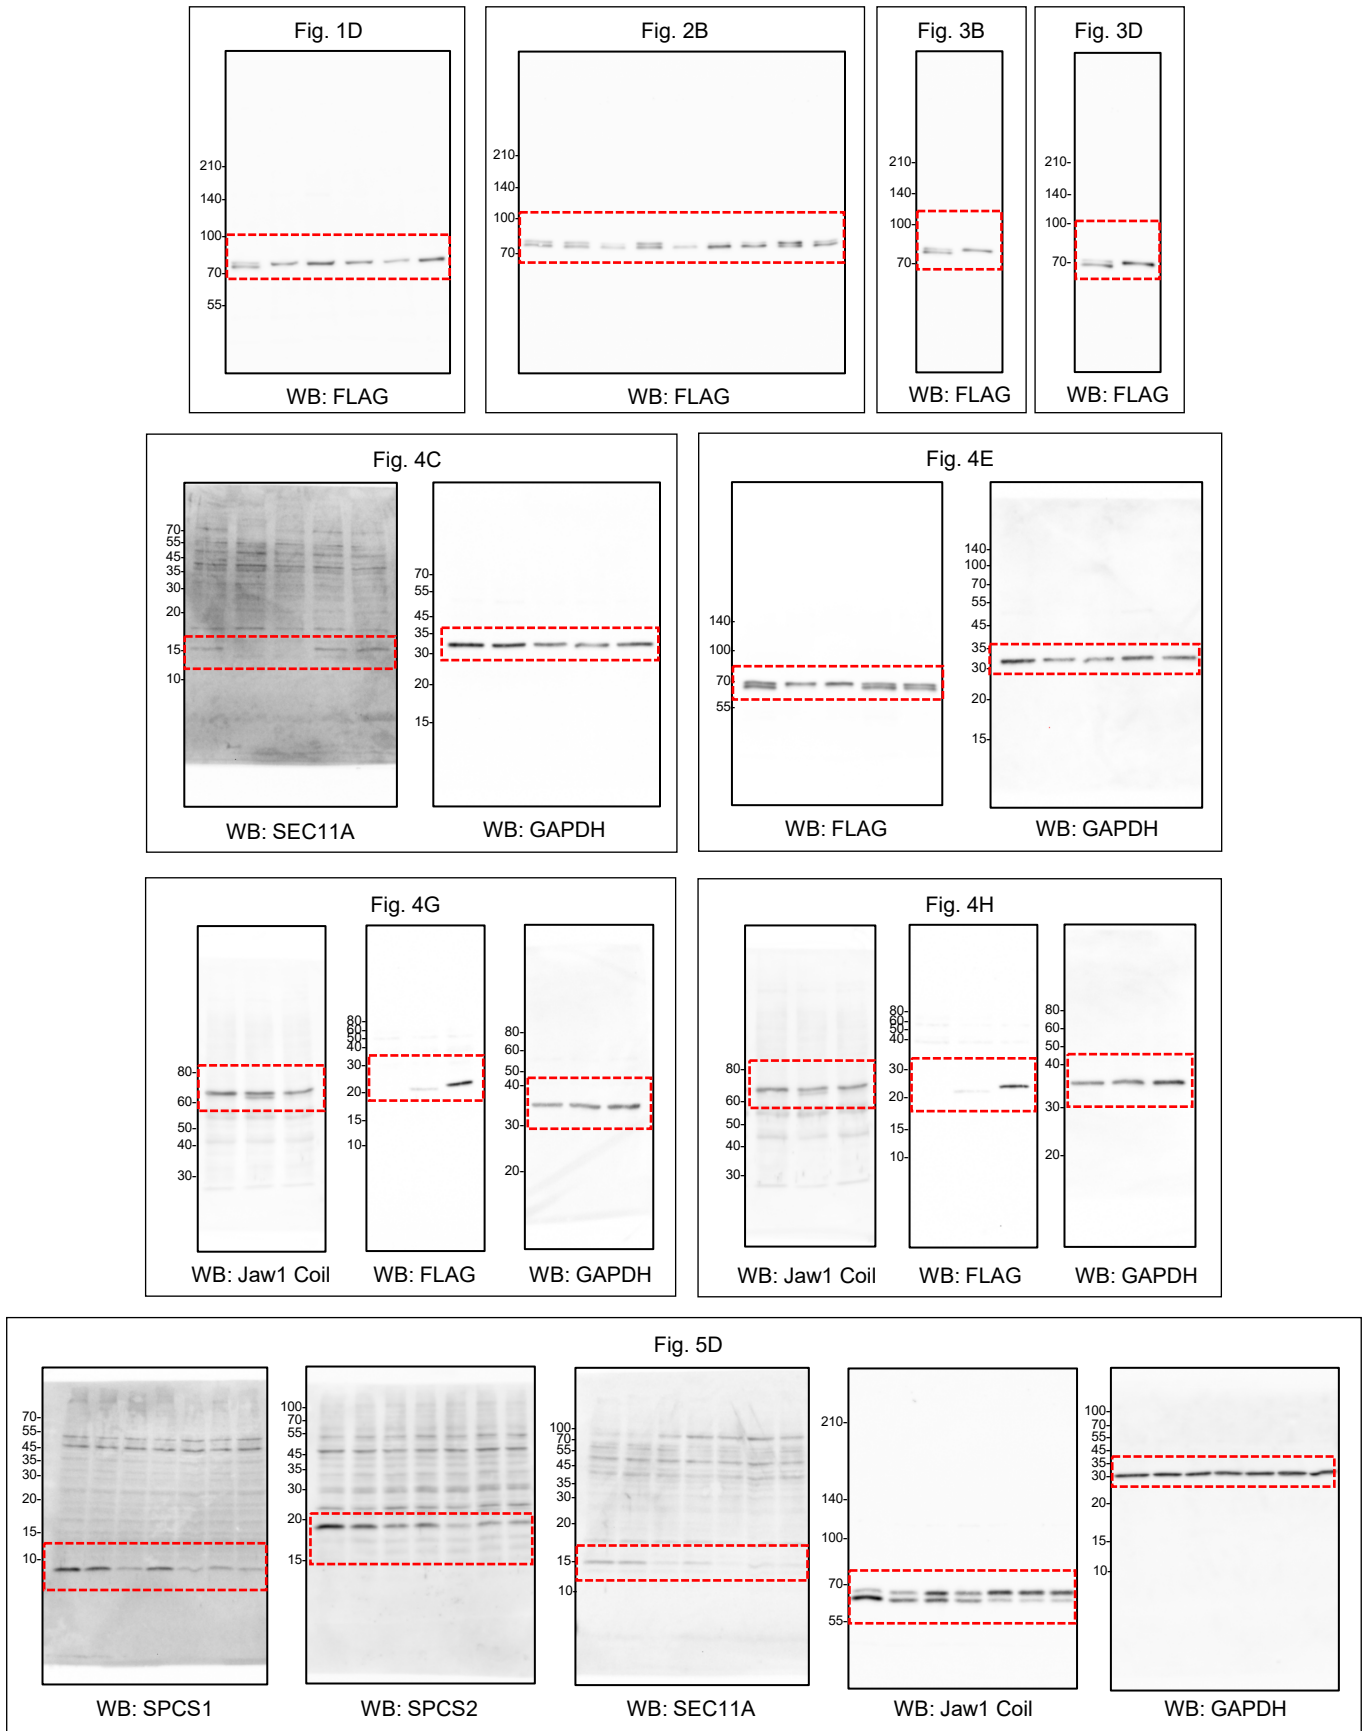

**Fig. S6. Blot transparency.** The area surrounded with red dot lines were cropped.

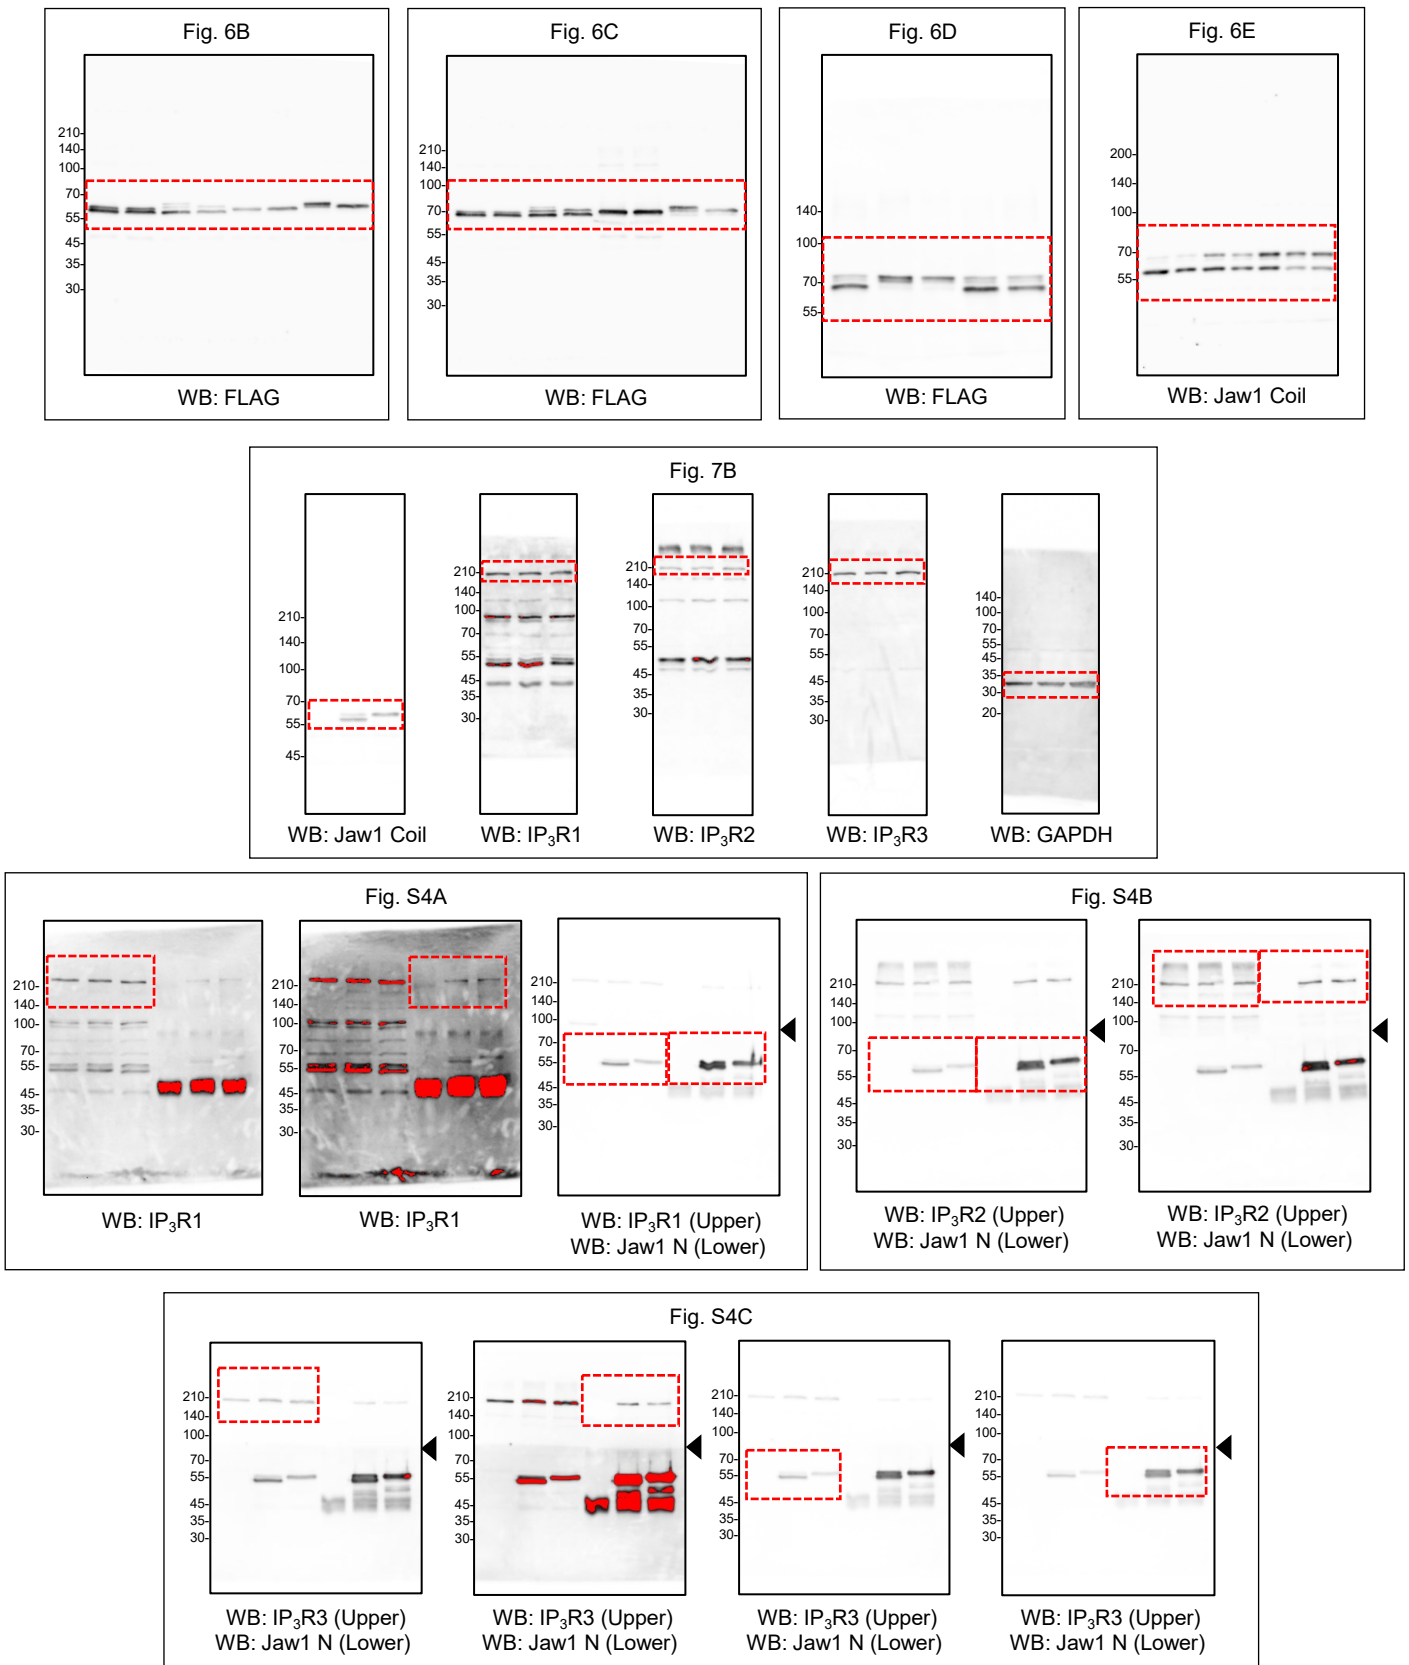

**Fig. S7. Blot transparency.** The area surrounded with red dot lines were cropped. Several membranes were cut at the black arrow point prior to hybridization with antibodies, thereby the full-length blots were not prepared.

**Table S1. Primer sets to produce the plasmids used for this study**

| Number    | Forward/Reverse | Sequence                                                                      |
|-----------|-----------------|-------------------------------------------------------------------------------|
| Primer 1  | Forward         | 5'-CATACTGATCGCAGCGCTGATGAGCTTCCTCACAGGTTACAGAAAGACTACAGCTGTGCC-3'            |
| Primer 1  | Reverse         | 5'-CTGGACTAGTGGATCCTCAGAGTGGAGGACCGTTGG-3'                                    |
| Primer 2  | Forward         | 5'-CATACTGATCGCAGCGCTGATGAGCTTCCTCACAGGTTCTGAAGTACTACAGCTGCACCC-3'            |
| Primer 2  | Reverse         | 5'-TGGACTAGTGGATCCCTAGTGGGAGTGGCCCGTTG-3'                                     |
| Primer 3  | Forward         | 5'-CATACTGATCGCAGCGCTGATGAGCTTCCTCACAGGTTGGCGAGGAGGAGCGC-3'                   |
| Primer 3  | Reverse         | 5'-CTGGACTAGTGGATCCCTAGTGGGCGGGGGCCATTGTA-3'                                  |
| Primer 4  | Forward         | 5'-CATACTGATCGCAGCGCTGATGAGCTTCCTCACAGGTTGGGGTCTCCTGCT-3'                     |
| Primer 4  | Reverse         | 5'-CTGGACTAGTGGATCCTCAGATTGGAGGGAGACCATTGACATAACTGAGC-3'                      |
| Primer 5  | Forward         | 5'-CATACTGATCGCAGCGCTGATGAGCTTCCTCACAGGTAGCCAGTCCCGCCA-3'                     |
| Primer 5  | Reverse         | 5'-CTGGACTAGTGGATCCTCACACTGGTGGCGCTGTAGTA-3'                                  |
| Primer 6  | Forward         | 5'-TCTGTGAAGCTCGTAACTTTTCAGC-3'                                               |
| Primer 6  | Reverse         | 5'-GGCCGCTGCAGCGGCCAAGAGCTGACCTGTGAGG-3'                                      |
| Primer 7  | Forward         | 5'-GCCGCTGCAGCGCCGCTGCGCCACACA-3'                                             |
| Primer 7  | Reverse         | 5'-CCACCGCATCCCCAGGGTAACCCCATAGAGCCACCGC-3'                                   |
| Primer 8  | Forward         | 5'-TCTGTGAAGCTCGTAACTTTTCAGC-3'                                               |
| Primer 8  | Reverse         | 5'-GGCCGCTGCAGCGCCGCTGTCTGGAAGAGCTG-3'                                        |
| Primer 9  | Forward         | 5'-GCCGCTGCAGCGGCCACACAGGAGGGGACTC-3'                                         |
| Primer 9  | Reverse         | 5'-CCACCGCATCCCCAGGGTAACCCCATAGAGCCACCGC-3'                                   |
| Primer 10 | Forward         | 5'-TCTGTGAAGCTCGTAACTTTTCAGC-3'                                               |
| Primer 10 | Reverse         | 5'-GGCCGCTGCAGCGGCCGCGCAGCCTCCA-3'                                            |
| Primer 11 | Forward         | 5'-GCCGCTGCAGCGCCCTCTGGTGTCTTAGAACA-3'                                        |
| Primer 11 | Reverse         | 5'-CCACCGCATCCCCAGGGTAACCCCATAGAGCCACCGC-3'                                   |
| Primer 12 | Forward         | 5'-TCTGTGAAGCTCGTAACTTTTCAGC-3'                                               |
| Primer 12 | Reverse         | 5'-GGCCGCTGCAGCGCCGCTCCCTCTCTGTGG-3'                                          |
| Primer 13 | Forward         | 5'-GCCGCTGCAGCGGCCAACACATCTTATGGCATTACCAG-3'                                  |
| Primer 13 | Reverse         | 5'-CCACCGCATCCCCAGGGTAACCCCATAGAGCCACCGC-3'                                   |
| Primer 14 | Forward         | 5'-TCTGTGAAGCTCGTAACTTTTCAGC-3'                                               |
| Primer 14 | Reverse         | 5'-GGCCGCTGCAGCGGCTAGAGACAGCCAGGAGTCCC-3'                                     |
| Primer 15 | Forward         | 5'-GCCGCTGCAGCGCCCATTTACCAGACTCGGGCATG-3'                                     |
| Primer 15 | Reverse         | 5'-CCACCGCATCCCCAGGGTAACCCCATAGAGCCACCGC-3'                                   |
| Primer 16 | Forward         | 5'-TCTGTGAAGCTCGTAACTTTTCAGC-3'                                               |
| Primer 16 | Reverse         | 5'-GGCCGCTGCAGCGGCCATAAGATGTGTTCTAGAGACAGCC-3'                                |
| Primer 17 | Forward         | 5'-GCCGCTGCAGCGCCGCGCATGATGGACCACTG-3'                                        |
| Primer 17 | Reverse         | 5'-CCACCGCATCCCCAGGGTAACCCCATAGAGCCACCGC-3'                                   |
| Primer 18 | Forward         | 5'-TCTGTGAAGCTCGTAACTTTTCAGC-3'                                               |
| Primer 18 | Reverse         | 5'-GGCCGCTGCAGCGCGAGTCTGGTAAATGGCCATAAGATGTG-3'                               |
| Primer 19 | Forward         | 5'-GCCGCTGCAGCGCCCTGCCAGTGTGAGGATCCA-3'                                       |
| Primer 19 | Reverse         | 5'-CCACCGCATCCCCAGGGTAACCCCATAGAGCCACCGC-3'                                   |
| Primer 20 | Forward         | 5'-TCTGTGAAGCTCGTAACTTTTCAGC-3'                                               |
| Primer 20 | Reverse         | 5'-GGCCGCTGCAGCGGCATCATGCCGAGTCTGGT-3'                                        |
| Primer 21 | Forward         | 5'-GCCGCTGCAGCGCCCTGAGGATCCACTAGTCCAGT-3'                                     |
| Primer 21 | Reverse         | 5'-CCACCGCATCCCCAGGGTAACCCCATAGAGCCACCGC-3'                                   |
| Primer 22 | Forward         | 5'-TCTGTGAAGCTCGTAACTTTTCAGC-3'                                               |
| Primer 22 | Reverse         | 5'-AGGGCTAGATTCGACGGCTGTCTGGAAGAGCTGA-3'                                      |
| Primer 23 | Forward         | 5'-GTCGAATCTAGCCCTACACAGGAGGGGACTC-3'                                         |
| Primer 23 | Reverse         | 5'-CCACCGCATCCCCAGGGTAACCCCATAGAGCCACCGC-3'                                   |
| Primer 24 | Forward         | 5'-ACTGTGAATCGGTTAACGTTAGACAAA-3'                                             |
| Primer 24 | Reverse         | 5'-CGGACTTGAGTCAACAGACTTCTGGAATAATTGGCCTGT-3'                                 |
| Primer 25 | Forward         | 5'-GTTGACTCAAGTCCGACACAGCAAGAGGACTCATGGA-3'                                   |
| Primer 25 | Reverse         | 5'-CCACCGCATCCCCAGGGTAACCCCATAGAGCCACCGC-3'                                   |
| Primer 26 | Forward         | 5'-TCTGTGAAGCTCGTAACTTTTCAGC-3'                                               |
| Primer 26 | Reverse         | 5'-CTGGACTAGTGGATCCTCAGCCGCTTGTGGAGAAAGGCACGTAGAAGTTGGGCCACTGGCAGTGGTCCATC-3' |
| Primer 27 | Forward         | 5'-ACTGTGAATCGGTTAACGTTAGACAAA-3'                                             |
| Primer 27 | Reverse         | 5'-GCCCTTAGACTCGAGTACGCCGCTTGTGGAGAAAGGCACGTAGAAGTTGGGCCACTGGTGGTGGCCCA-3'    |
| Primer 28 | Forward         | 5'-TCGAGGGCGTGGCGATGCCGGCGCGGAAGATGATGTTGGT-3'                                |
| Primer 28 | Reverse         | 5'-CTAGACCACCATCATCTTCCGCGCCCGCATCGCCACGCC-3'                                 |
| Primer 29 | Forward         | 5'-TTAACTTAAGCTTGGTACCATGCTCTGTGTA-3'                                         |
| Primer 29 | Reverse         | 5'-TCGCCACGCCCTCGAGCACTGGCAGTGGTCCATC-3'                                      |
| Primer 30 | Forward         | 5'-ACTGCCAGTCTCGAGATGCTCTGTGTAAGGTTCC-3'                                      |
| Primer 30 | Reverse         | 5'-TCGCCACGCCCTCGACCTGCTGAAAGTTAACGAGCT-3'                                    |
| Primer 31 | Forward         | 5'-CACCGAAGTGAAAGTCCGATTGTAG-3'                                               |
| Primer 31 | Reverse         | 5'-AAACCTACAATCGGACTTTCACTTC-3'                                               |
| Primer 32 | Forward         | 5'-CACCGAAGGCTTGATCGTGCTCAC-3'                                                |
| Primer 32 | Reverse         | 5'-AAACGTGAGCACGATCAAGCCTTTC-3'                                               |
| Primer 33 | Forward         | 5'-TTTAACTTAAGCTTGGTACCATGCTGTCTTAGACTTTTTGGACG-3'                            |
| Primer 33 | Reverse         | 5'-CCACACTGGACTAGTGGATCCTTACTCAGATGAACCAGCACG-3'                              |
| Primer 34 | Forward         | 5'-TTTAACTTAAGCTTGGTACCATGGTGGTGGCGGG-3'                                      |
| Primer 34 | Reverse         | 5'-CCACACTGGACTAGTGGATCCTTACTCAGATGATTAACACATATGCA-3'                         |
| Primer 35 | Forward         | 5'-GCATCTCCAGCTTACAGGT-3'                                                     |
| Primer 35 | Reverse         | 5'-GCTCTCTGCCTGTTTGGT-3'                                                      |
